# Supplementary material for: Photocatalytic activity of ZrO2 composites with graphitic carbon nitride for hydrogen production under visible light
Source: Royal Society of Chemistry journal article supplement (doi:10.1039/c8nj06507a), 2019-01-01
Supplement: c8nj06507a1.pdf [file c8nj06507a1.pdf]

## Photocatalytic activity comparison of $\text{ZrO}_2$ composite with graphitic carbon nitride for hydrogen production under visible light

Mohammed Ismael<sup>1</sup>, Ying Wu<sup>2</sup>, Michael Wark<sup>1</sup>

<sup>1</sup> Institute of Chemistry, Technical Chemistry, Carl von Ossietzky University Oldenburg, Carl-von-Ossietzky-Str. 9-11, 26129 Oldenburg, Germany, E-mail: [michael.wark@uni-oldenburg.de](mailto:michael.wark@uni-oldenburg.de)  
<sup>2</sup> Institute of physical Chemistry, Zhejiang Normal University, Jinhua 321004, China.

### Supporting Information (SI):

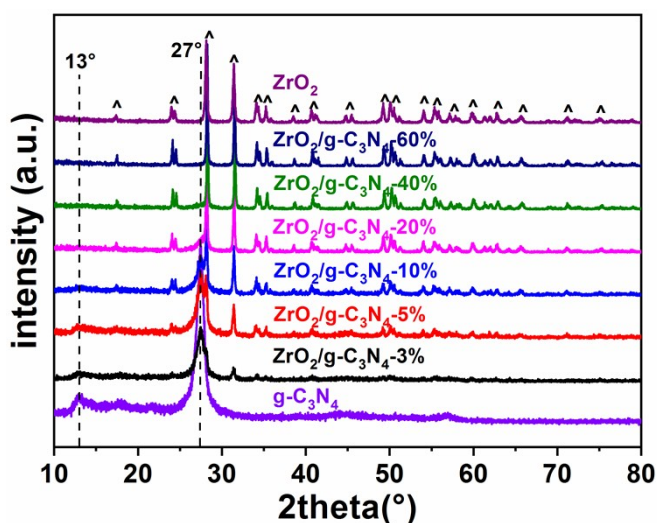

**Figure S1:** The powder XRD patterns of  $\text{g-C}_3\text{N}_4$ ,  $\text{ZrO}_2$  and  $\text{ZrO}_2/\text{g-C}_3\text{N}_4$  composites.

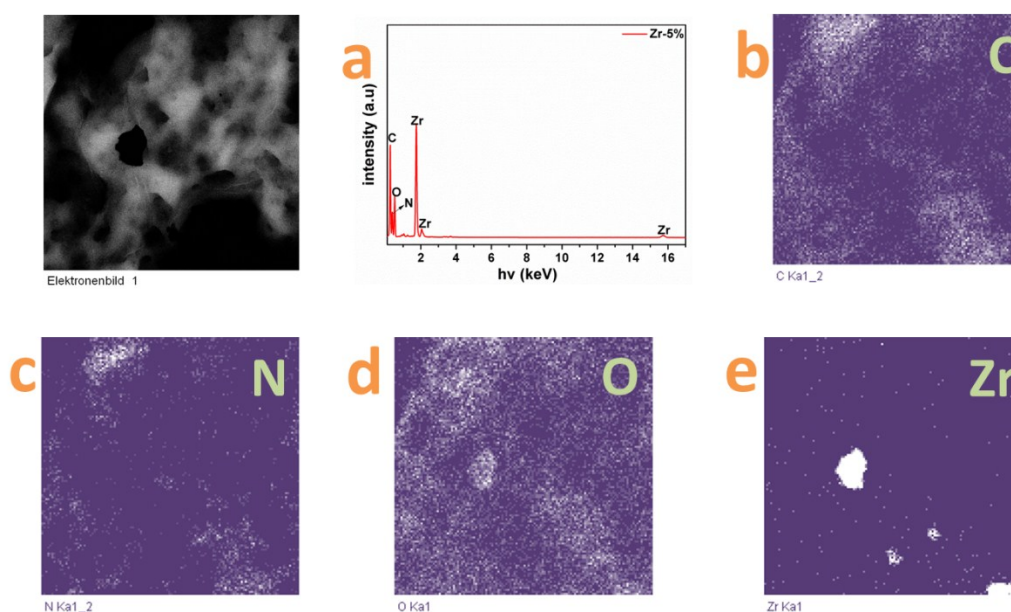

**Figure S2:** EDS spectrum of  $\text{ZrO}_2/\text{g-C}_3\text{N}_4$ -5% (a) and EDAX elemental mappings of  $\text{ZrO}_2/\text{g-C}_3\text{N}_4$ -5% composite from the selected area for (b) C, (c) N, (d) O and (e) Zr.

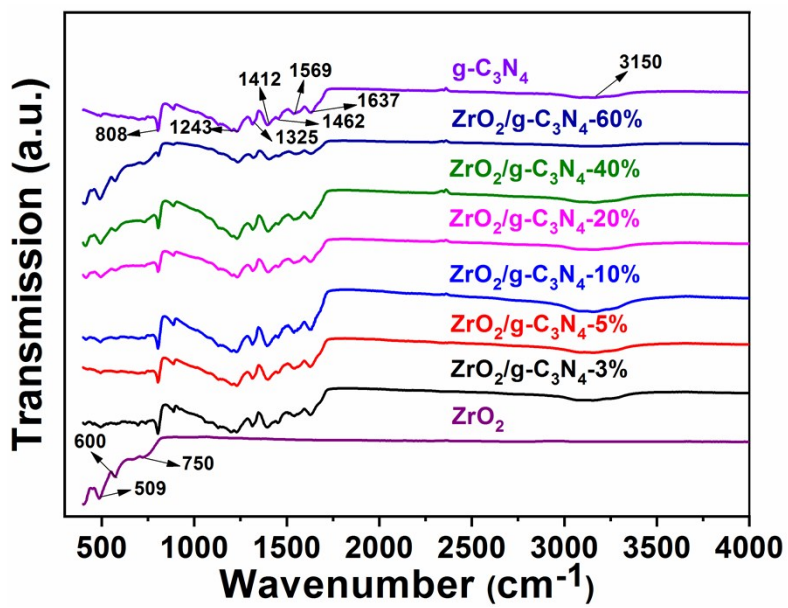

**Figure S3:** FT-IR spectra for ZrO<sub>2</sub>, g-C<sub>3</sub>N<sub>4</sub> and different ZrO<sub>2</sub>/g-C<sub>3</sub>N<sub>4</sub> composites
